# Supplementary material for: A Novel Small-Molecule Inhibitor of MRCK Prevents Radiation-Driven Invasion in Glioblastoma
Source: Oxford University Press journal article supplement (doi:10.1158/0008-5472.can-18-1697), 2018-10-02
Supplement: 00085472can181697-sup-202958_2_supp_5012370_ppzpzm.docx [file 00085472can181697-sup-202958_2_supp_5012370_ppzpzm.docx]

| **Antibody** | **Catalogue number** |
| --- | --- |
| MRCKα | Abnova, H00008476M01 |
| MRCKβ | Abnova, H00009578-M03 |
| MYPT1 | Cell Signalling, 2634 |
| PhosphoMYPT1696 | Millipore, ABS45 |
| MLC2 | Cell signalling, 3672 |
| PhosphoMLC2 | Cell signalling 3674 |

Sup. Table 1. Antibodies used for Western blotting
