# Supplementary material for: A Novel Small-Molecule Inhibitor of MRCK Prevents Radiation-Driven Invasion in Glioblastoma
Source: Oxford University Press journal article supplement (doi:10.1158/0008-5472.can-18-1697), 2018-10-02
Supplement: 00085472can181697-sup-202958_2_supp_5013607_pfngy4.docx [file 00085472can181697-sup-202958_2_supp_5013607_pfngy4.docx]

**Supplementary videos 1 and 2: Radiation increases cell migration speed in an *ex vivo* migration assay.** Fluorescently labelled E2 cells were irradiated with 2Gy (S2) or left untreated (S1) and seeded onto fresh murine brain slices. Cell motility was imaged using confocal time-lapse microscopy.

**Supplementary videos S3 – S6: BDP-9066 induces an aberrant morphology that prevents migration of GBM cells.** Subconfluent migration assays in the presence of DMSO (S3), 100nM BDP-9066 (S4) or 1000nM BDP-9066 (S5). (S6) *Ex vivo* migration assay in the presence of BDP-9066.
