# Supplementary material for: A Novel Small-Molecule Inhibitor of MRCK Prevents Radiation-Driven Invasion in Glioblastoma
Source: Oxford University Press journal article supplement (doi:10.1158/0008-5472.can-18-1697), 2018-10-02
Supplement: 00085472can181697-sup-202958_2_supp_5020621_pyyyy0.docx [file 00085472can181697-sup-202958_2_supp_5020621_pyyyy0.docx]

**Figure S1. Increased GBM cell invasion *in vivo* is confirmed by a human specific antibody against HLA (A)** Tumour volume prior to initiation of treatment was calculated from multi-slice T2 MR imaging. **(B)** Ki67 staining corresponds to HLA positive cells. Brains from mice bearing G7 intracranial tumours were excised and stained via IHC for Ki67 and HLA. Numbers of positive cells were quantified using automated analysis. Statistical analysis was performed to obtain Pearson correlation coefficient (r).

**Figure S2. (A)** Tumour volume prior to initiation of treatment was calculated from multi-slice T2 MR imaging. **(B)** Circulating BDP-9066 levels were confirmed at the time of cull by mass spectrometry. **(C)**  CT imaging of mice prior to RT to allow tissue segmentation and positioning of isocentre below surgery drill hole (white arrow). The irradiated area is encompassed by the blue lines.
