# Supplementary figures and images for: A Novel Small-Molecule Inhibitor of MRCK Prevents Radiation-Driven Invasion in Glioblastoma
Source: Oxford University Press journal article supplement (doi:10.1158/0008-5472.can-18-1697), 2018-10-02

Supplemental Table 2: Summary of the properties of BBP-9066 [42]


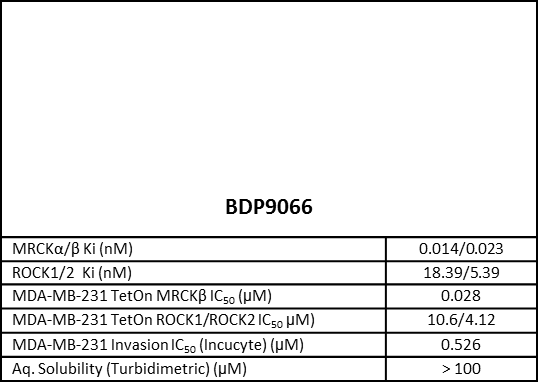

Supplement: 00085472can181697-sup-202958_2_supp_5012371_pwzwzm.docx [file 00085472can181697-sup-202958_2_supp_5012371_pwzwzm.docx]
